# Supplementary material for: Soil Fungal Community Characteristics at Timberlines of Sejila Mountain in Southeast Tibet, China
Source: MDPI journal article supplement (doi:10.3390/jof9050596), 2023-05-21
Supplement: s1 [file s1]

**Table S1** Results for data preprocessing and quality control

| Timberline Sites | Vegetation Zones | Plots | Raw PE  | Raw Tags | Clean Tags | Effective Tags | Bases (nt) | Average Length (nt) | Q20 | Q30 | GC Content (%) | Effective Rate (%) |
|------------------|------------------|-------|---------|----------|------------|----------------|------------|---------------------|-----|-----|----------------|--------------------|
| South            | F                | 1     | 99387   | 97477    | 96988      | 67233          | 16381808   | 244                 | 99  | 96  | 45             | 68                 |
|                  |                  | 2     | 98341   | 96219    | 95777      | 65931          | 14734545   | 223                 | 99  | 97  | 45             | 67                 |
|                  |                  | 3     | 99159   | 97359    | 96746      | 66965          | 16425607   | 245                 | 99  | 96  | 43             | 68                 |
|                  | FL               | 1     | 92819   | 90647    | 90173      | 67442          | 15581496   | 231                 | 99  | 97  | 43             | 73                 |
|                  |                  | 2     | 83526   | 81904    | 81475      | 68173          | 14379488   | 211                 | 99  | 97  | 45             | 82                 |
|                  |                  | 3     | 94602   | 93152    | 92930      | 63957          | 13445660   | 210                 | 99  | 97  | 46             | 68                 |
|                  | TL               | 1     | 81068   | 78829    | 78553      | 60598          | 13491193   | 223                 | 99  | 97  | 45             | 75                 |
|                  |                  | 2     | 91697   | 90053    | 89737      | 67083          | 15234191   | 227                 | 99  | 97  | 43             | 73                 |
|                  |                  | 3     | 93379   | 92137    | 91965      | 66074          | 13122574   | 199                 | 99  | 98  | 49             | 71                 |
|                  | TSL              | 1     | 91247   | 87955    | 87576      | 61114          | 13841887   | 226                 | 99  | 97  | 45             | 67                 |
|                  |                  | 2     | 85547   | 83664    | 83384      | 65692          | 15306767   | 233                 | 99  | 96  | 44             | 77                 |
|                  |                  | 3     | 98774   | 97224    | 96930      | 69292          | 14858314   | 214                 | 99  | 97  | 45             | 70                 |
|                  | S                | 1     | 80456   | 77753    | 77439      | 69406          | 16066673   | 231                 | 99  | 97  | 41             | 86                 |
|                  |                  | 2     | 91981   | 89366    | 89051      | 66090          | 15370038   | 233                 | 99  | 96  | 43             | 72                 |
|                  |                  | 3     | 82237   | 79962    | 79404      | 68315          | 16639519   | 244                 | 99  | 96  | 43             | 83                 |
| North            | F                | 1     | 95226   | 93412    | 93085      | 62638          | 15188782   | 242                 | 99  | 96  | 47             | 66                 |
|                  |                  | 2     | 85512   | 83636    | 82745      | 60264          | 15288927   | 254                 | 99  | 96  | 46             | 70                 |
|                  |                  | 3     | 77454   | 76018    | 53339      | 49412          | 13958183   | 282                 | 98  | 95  | 46             | 64                 |
|                  | FL               | 1     | 87833   | 85861    | 85233      | 62317          | 16473150   | 264                 | 99  | 95  | 46             | 71                 |
|                  |                  | 2     | 97194   | 94246    | 93845      | 65282          | 16772547   | 257                 | 99  | 96  | 45             | 67                 |
|                  |                  | 3     | 83056   | 80716    | 80150      | 66691          | 16080536   | 241                 | 99  | 96  | 45             | 80                 |
|                  | TL               | 1     | 97007   | 95003    | 94117      | 69415          | 17494541   | 252                 | 99  | 96  | 48             | 72                 |
|                  |                  | 2     | 87504   | 85026    | 84622      | 68183          | 15884753   | 233                 | 99  | 96  | 46             | 78                 |
|                  |                  | 3     | 94375   | 91628    | 91104      | 65975          | 16212827   | 246                 | 99  | 96  | 44             | 70                 |
|                  | TSL              | 1     | 90068   | 87495    | 60344      | 56911          | 15978084   | 281                 | 98  | 95  | 46             | 63                 |
|                  |                  | 2     | 98957   | 97280    | 96995      | 68916          | 14728792   | 214                 | 99  | 97  | 46             | 70                 |
|                  |                  | 3     | 99866   | 97535    | 97096      | 66756          | 15124275   | 227                 | 99  | 97  | 44             | 67                 |
|                  | S                | 1     | 88652   | 85585    | 84937      | 62759          | 13502171   | 215                 | 99  | 97  | 44             | 71                 |
|                  |                  | 2     | 91031   | 89372    | 89091      | 65579          | 15720696   | 240                 | 99  | 96  | 44             | 72                 |
|                  |                  | 3     | 80804   | 78951    | 78499      | 68146          | 14582100   | 214                 | 99  | 97  | 46             | 84                 |
| Total            |                  |       | 2718759 | 2655465  | 2593330    | 1952609        | 457870124  |                     |     |     |                |                    |
| Average          |                  |       | 90625   | 88516    | 86444      | 65087          | 15262337   | 235                 | 99  | 96  | 45             | 72                 |
| Max              |                  |       | 99866   | 97535    | 97096      | 69415          | 17494541   | 282                 | 99  | 98  | 49             | 86                 |
| Min              |                  |       | 77454   | 76018    | 53339      | 49412          | 13122574   | 199                 | 98  | 95  | 41             | 63                 |

<sup>a</sup> F, forest; FL, forest line; TL, tree line; TSL, tree species line; S, shrub; Raw PE, the raw PE reads produced by sequencer; Raw tags, the tags reads obtained by combining; Clean tags, the reads after filtered out raw reads with low quality and short length; Effective tags, the clean reads after filtered out chimeras; Bases, the base numbers of the effective reads; Average length, the average length of the effective reads; Q20 and Q30, the percentages of bases with quality values > 20 and 30 in the effective reads; GC content, the percentage of GC bases in the effective reads; Effective rate, the percentage of the effective reads in the raw PE reads.
